# Supplementary material
Source: publisher figshare collection journal article supplement (https://sage.figshare.com/ndownloader/files/12453488)

## Supplementary File 3

### Distribution of lighting for the regions of London and Île-de-France in 1992 and 2013

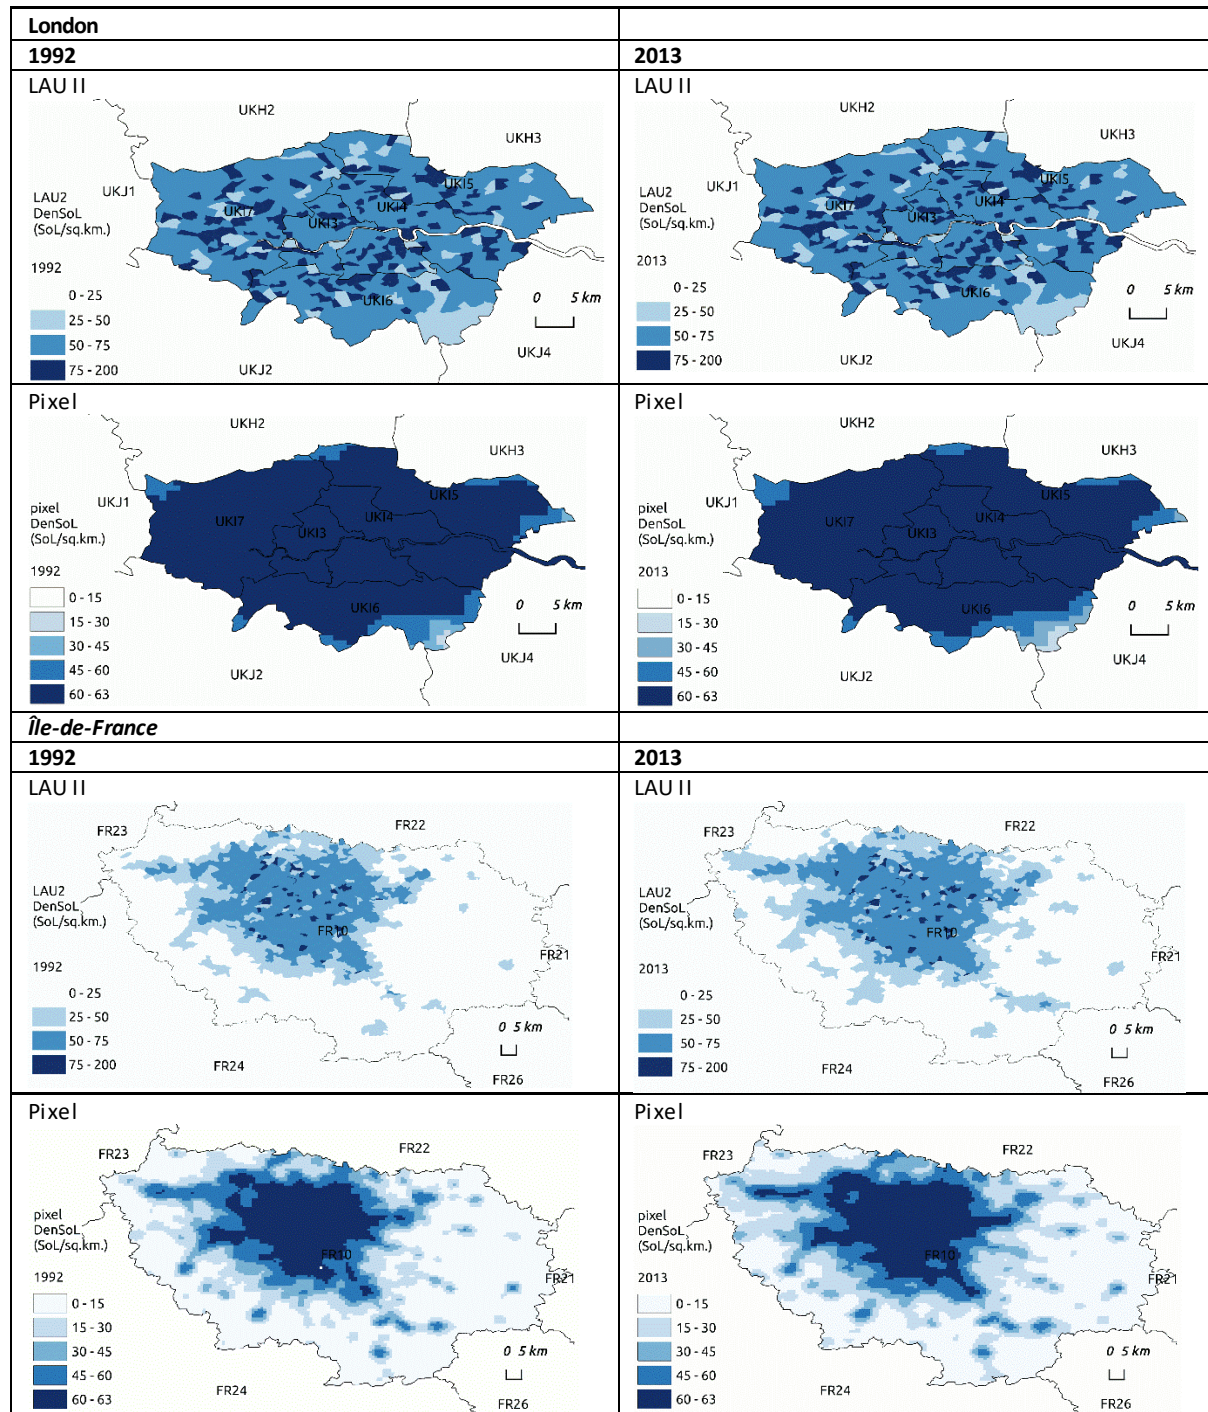

Supplement: Supplementary file 1 [file 12453488]
